# Supplementary material for: Effects of the MAML2 genetic variants in glioma susceptibility and prognosis
Source: Oxford University Press journal article supplement (doi:10.1042/bsr20192091), 2019-10-01
Supplement: bsr-2019-2091_supp.pdf [file bsr-2019-2091_supp.pdf]

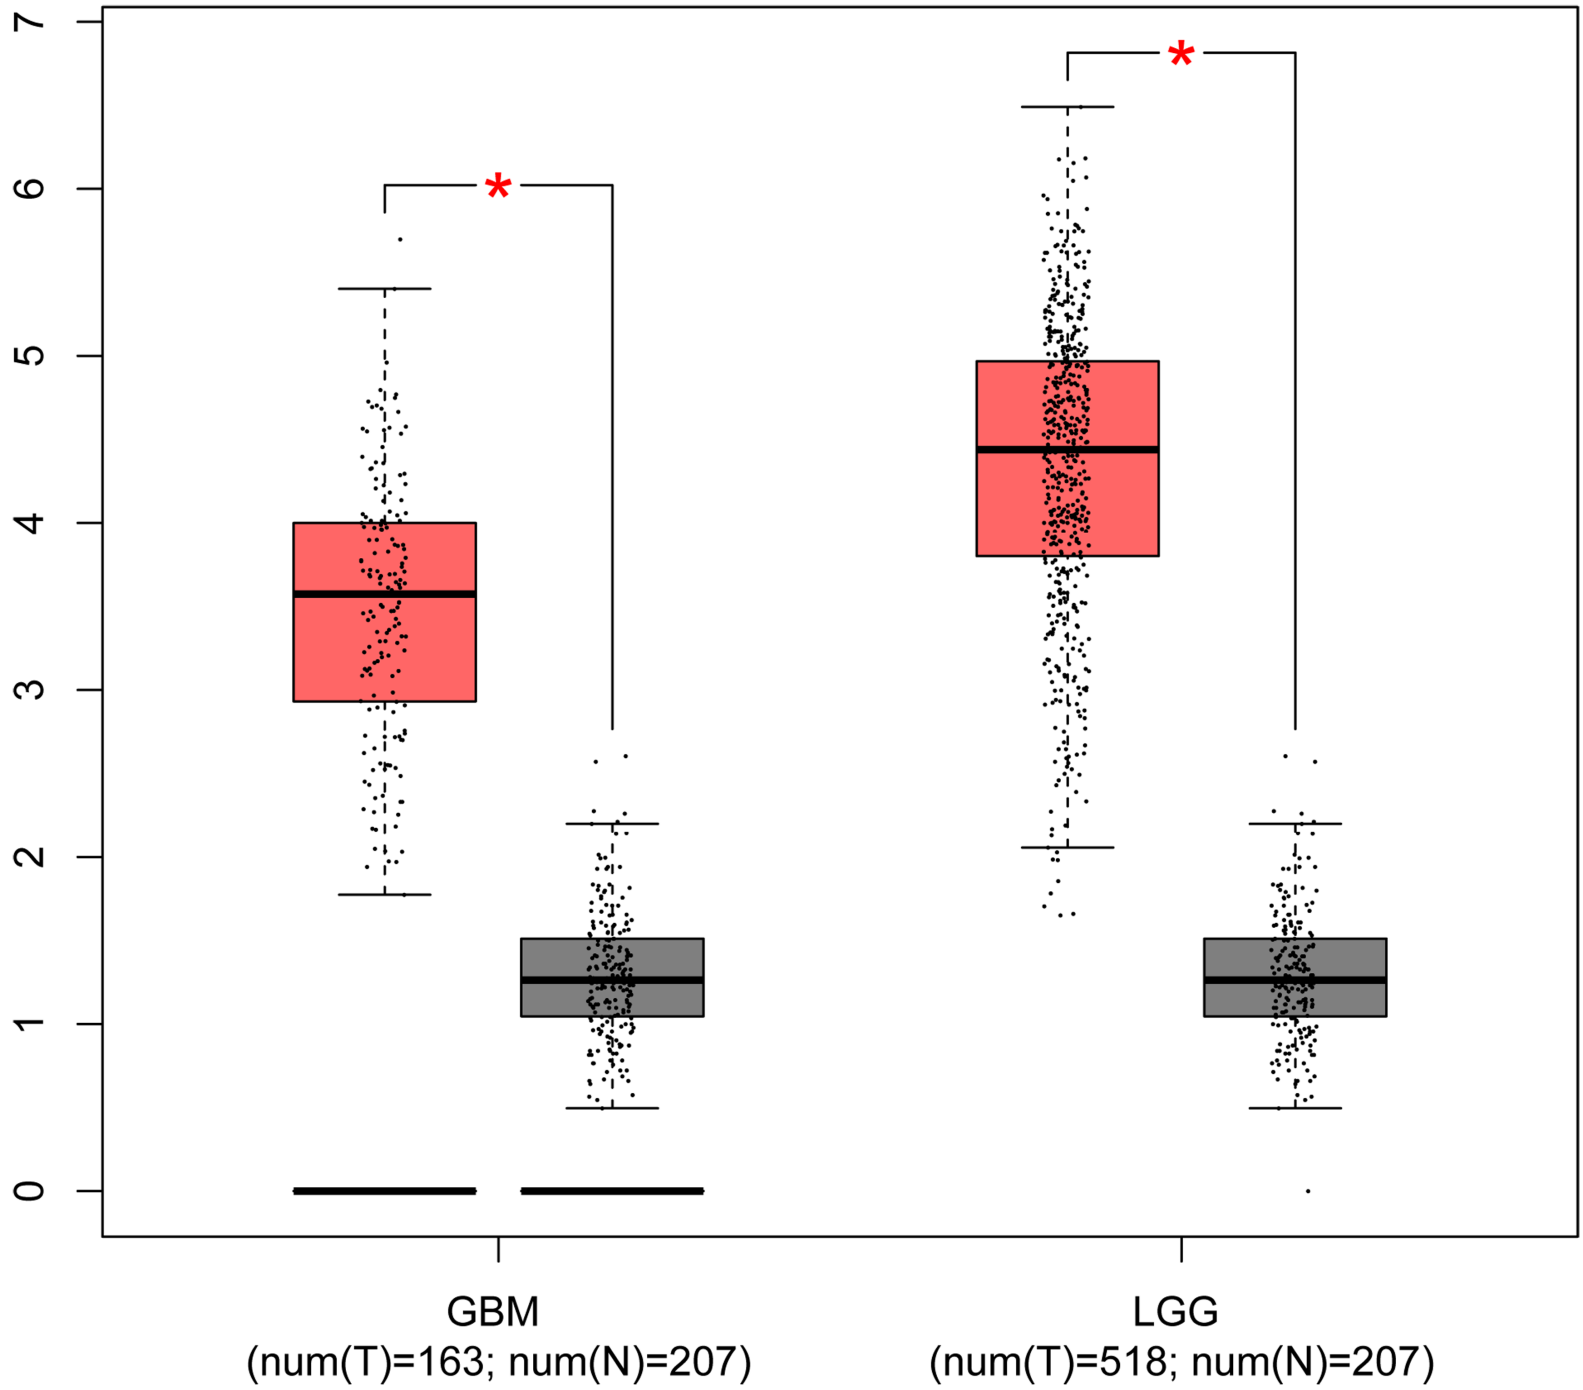

**Supplementary Figure 1.** MAML2 gene expression is up-regulated in glioma compared with that in normal lung tissues by GEPIA database.  
GBM: glioblastoma multiforme; LGG lower grade glioma.  
\* indicates statistical significance ( $p < 0.01$ ).

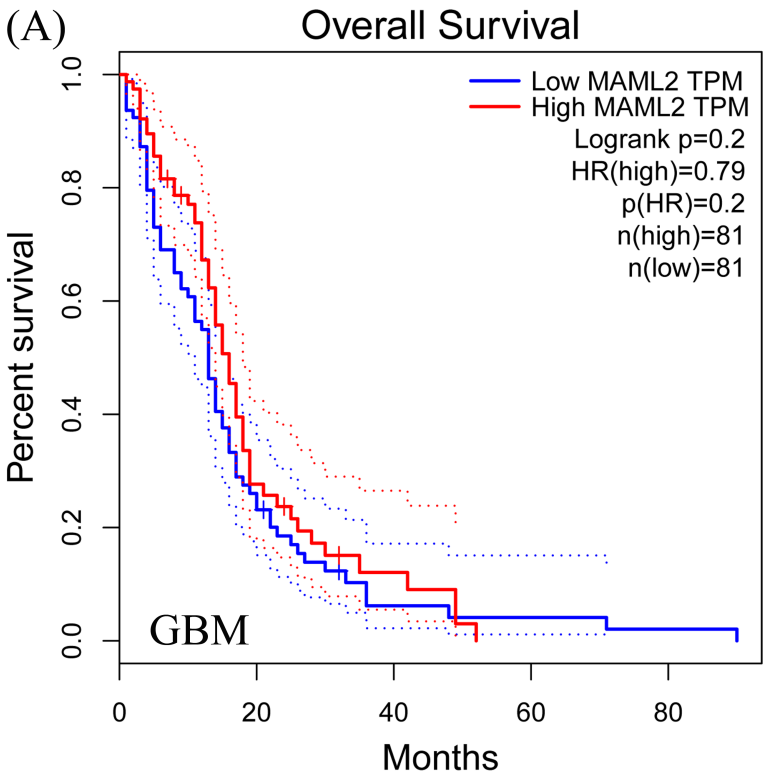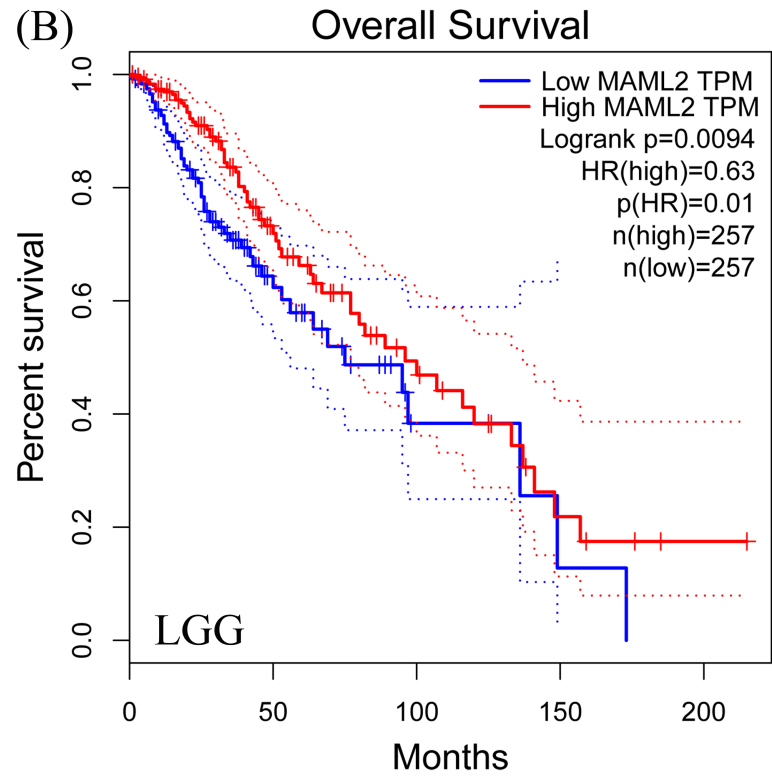

**Supplementary Figure 2.** Kaplan–Meier plots of overall survival for the MAML2 expression in glioma by GEPIA database.

GBM: glioblastoma multiforme; LGG lower grade glioma.

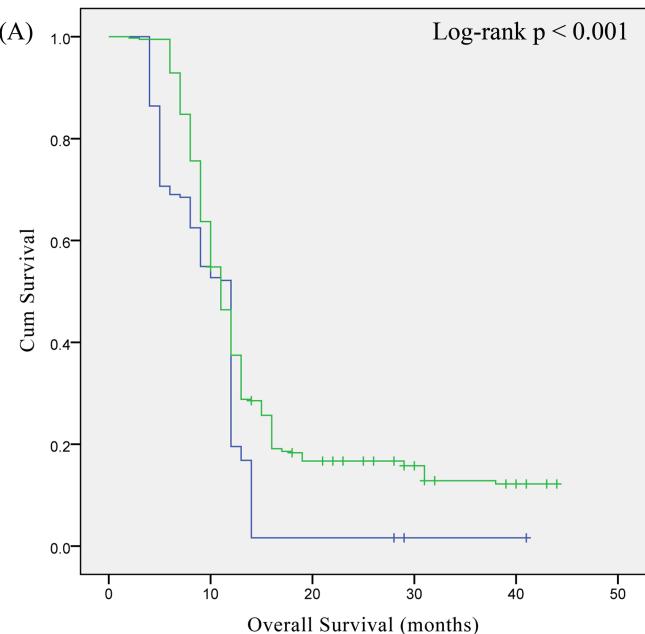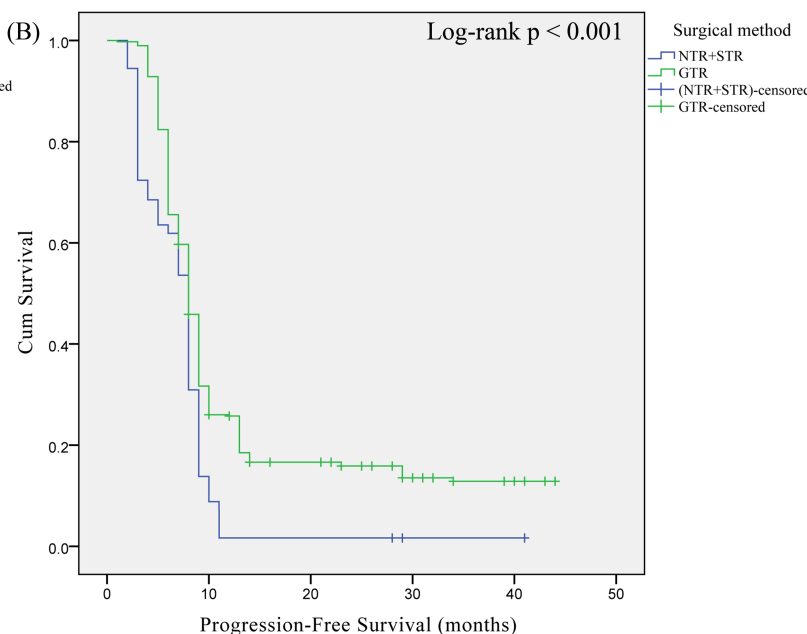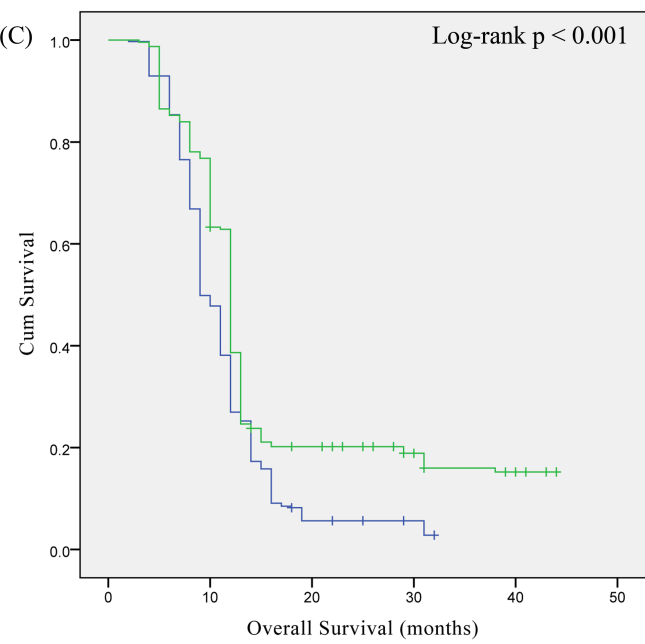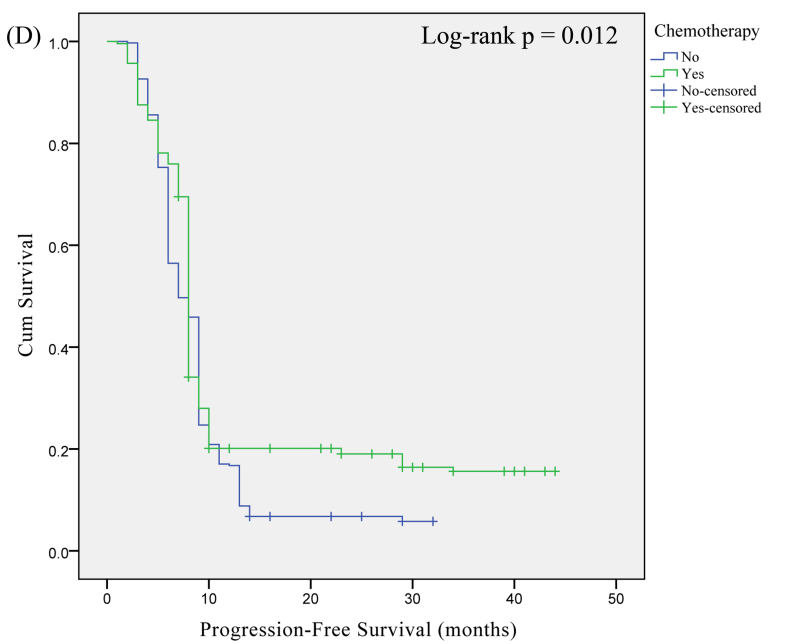

**Supplementary Figure 3.** Kaplan-Meier curves for overall survival and progression-free survival according to surgical method (A and C) and use of chemotherapy (B and D) in patients with glioma.

**Supplementary Table 1. Primers sequence of PCR and UEP of *MAML2* SNPs used in this study**

| SNP        | First Primer(5'-3')            | Second Primer (5'-3')          | UEP_DIR | UEP SEQ (5'-3')             |
|------------|--------------------------------|--------------------------------|---------|-----------------------------|
| rs7107785  | ACGTTGGATGTGATGAAGCGAGCCACTTCC | ACGTTGGATGGAGTATACTGGGAGAATTGC | F       | GGGACAAGGGAATCTTTC          |
| rs479825   | ACGTTGGATGATGCTCCTTTACGTGTTGCC | ACGTTGGATGCAAGCGATTCTGTGTGTTCC | F       | CCTGAAGTTAGGCTCAC           |
| rs7938889  | ACGTTGGATGCAGAAAGGAAATGCGTTGTA | ACGTTGGATGCCACATTATGAAACAAGC   | F       | CCTATTAAGTTGAATAATACTGAAATA |
| rs11021499 | ACGTTGGATGAGAAGGGAGAGGACTTTCTG | ACGTTGGATGCTCAGGGCCTACAAAAAATG | F       | gggtGAGCAACTTATTGTGGAG      |
| rs7115578  | ACGTTGGATGAATGAGCCCCTTCTGTGATG | ACGTTGGATGTGTATGATTTGCTCAATGGG | F       | cGCTTAATAAAACATAACGTTATTGA  |
| rs4598633  | ACGTTGGATGTTTTTCCCCCTTAGTAAGAC | ACGTTGGATGAACAGCTTAGCTGCTATGAG | R       | ACCACAATTGAAAAGCC           |
| rs485842   | ACGTTGGATGAGGCACCAGCCATTAAGAAG | ACGTTGGATGCTCTCTCACTTTTCTCTCAC | R       | cTGTTCAATTCTCTGCCAAC        |

SNP: single nucleotide polymorphism; UEP: unextended mini sequencing primer; DIR: direction; SEQ, sequence.

**Supplementary Table 2. The information and HWE about the candidate SNPs in *MAML2***

| SNP ID     | Chr:Position | Role   | Alleles<br>(A/B) | MAF   |          | <i>p</i> -value for<br>HWE | Haploreg                                                                                                   | SNPinfo Web<br>Server |
|------------|--------------|--------|------------------|-------|----------|----------------------------|------------------------------------------------------------------------------------------------------------|-----------------------|
|            |              |        |                  | Cases | Controls |                            |                                                                                                            |                       |
| rs7107785  | 11:96014174  | Intron | T/C              | 0.197 | 0.202    | 0.406                      | Promoter histone marks, Enhancer histone marks, DNase, Proteins bound                                      | TFBS                  |
| rs479825   | 11:96198321  | Intron | C/T              | 0.339 | 0.353    | 0.493                      | Promoter histone marks, Enhancer histone marks, DNase, Proteins bound, Motifs changed, NHGRI/EBI GWAS hits |                       |
| rs7938889  | 11:96231355  | Intron | T/C              | 0.412 | 0.449    | 0.787                      | Promoter histone marks, Enhancer histone marks, Motifs changed                                             |                       |
| rs11021499 | 11:96258965  | Intron | G/A              | 0.468 | 0.491    | 0.422                      | Promoter histone marks, Enhancer histone marks, DNase, Motifs changed, NHGRI/EBI GWAS hits                 |                       |
| rs7115578  | 11:96266936  | Intron | G/A              | 0.455 | 0.466    | 0.857                      | Promoter histone marks, Enhancer histone marks, DNase, Motifs changed, NHGRI/EBI GWAS hits                 |                       |
| rs4598633  | 11:96278187  | Intron | T/C              | 0.449 | 0.446    | 0.786                      | Promoter histone marks, Enhancer histone marks, DNase, GRASP QTLhits                                       |                       |
| rs485842   | 11:96290050  | Intron | T/C              | 0.245 | 0.286    | 0.511                      | Enhancer histone marks, Motifs change, NHGRI/EBI GWAS hits                                                 |                       |

HWE, Hardy-Weinberg equilibrium; SNP, single nucleotide polymorphism; MAF, minor allele frequency; eQTL, expression quantitative trait loci; TFBS, transcription factor binding sites.

**Supplementary Table 3. Relationship of clinical stage with *MAML2* rs7115578 polymorphism in glioma patients adjusted by WHO grade**

| SNP ID    | Model        | Genotype | III-IV | I-II | Adjusted by age and gender |                  |
|-----------|--------------|----------|--------|------|----------------------------|------------------|
|           |              |          |        |      | OR (95%CI)                 | <i>p</i>         |
| rs7115578 | Allele       | A        | 230    | 397  | 1                          | 0.507            |
|           |              | G        | 182    | 341  | 0.92 (0.72-1.17)           |                  |
|           | Genotype     | AA       | 59     | 118  | 1                          | 0.102            |
|           |              | AG       | 112    | 161  | 1.4 (0.94-2.08)            |                  |
|           |              | GG       | 35     | 90   | 0.79 (0.48-1.31)           |                  |
|           | Dominant     | AA       | 59     | 118  | 1                          | 0.390            |
|           |              | AG-GG    | 147    | 251  | 1.18 (0.81-1.72)           |                  |
|           | Recessive    | AA-AG    | 171    | 279  | 1                          | <b>0.048</b>     |
|           |              | GG       | 35     | 90   | 0.64 (0.41-1.00)           |                  |
|           | Log-additive | ---      | ---    | ---  | ---                        | 0.93 (0.73-1.18) |

SNP, single nucleotide polymorphism; OR, odds ratio; 95% CI, 95% confidence interval.

*p* values were calculated by logistic regression analysis with adjustments for age and gender.

*p* < 0.05 means the data is statistically significant.

**Supplementary Table 4. Univariate analysis of the impact of clinical factors on glioma patient OS and PFS**

| Variables              | Total                  | Event | OS       |         |             |             |                         | PFS      |              |             |             |                         |              |
|------------------------|------------------------|-------|----------|---------|-------------|-------------|-------------------------|----------|--------------|-------------|-------------|-------------------------|--------------|
|                        |                        |       | Log-rank | MST     | SR          | HR (95%CI)  | <i>p</i>                | Log-rank | MST          | SR          | HR (95%CI)  | <i>p</i>                |              |
|                        |                        |       | <i>p</i> | (month) | (1-/3-year) |             |                         | <i>p</i> | (month)      | (1-/3-year) |             |                         |              |
| <b>Gender</b>          | Male                   | 320   | 284      | 0.352   | 14          | 0.326/0.088 | 1.08 (0.91-1.28)        | 0.394    | 0.241        | 12          | 0.203/0.097 | 1.10 (0.92-1.31)        | 0.293        |
|                        | female                 | 255   | 230      |         | 13          | 0.307/0.096 |                         |          |              | 11          | 0.153/0.098 |                         |              |
| <b>Age</b>             | ≤40                    | 257   | 221      | 0.061   | 15          | 0.351/0.121 | 1.17 (0.98-1.39)        | 0.086    | 0.121        | 12          | 0.202/0.129 | 1.13 (0.95-1.35)        | 0.164        |
|                        | >40                    | 318   | 293      |         | 13          | 0.291/0.070 |                         |          |              | 10          | 0.164/0.074 |                         |              |
| <b>WHO grade</b>       | I- II                  | 369   | 324      | 0.094   | 14          | 0.328/0.111 | 1.15 (0.96-1.38)        | 0.125    | 0.122        | 12          | 0.191/0.118 | 1.14 (0.95-1.37)        | 0.166        |
|                        | III-IV                 | 206   | 190      |         | 13          | 0.300/0.067 |                         |          |              | 10          | 0.163/0.069 |                         |              |
| <b>Surgical method</b> | NTR+STR                | 183   | 181      | <0.001  | 10          | 0.196/-     | <b>0.63 (0.52-0.76)</b> | <0.001   | <0.001       | 7           | 0.017/-     | <b>0.59 (0.49-0.71)</b> | <0.001       |
|                        | GTR                    | 392   | 333      |         | 15          | 0.375/0.129 |                         |          |              | 13          | 0.258/0.135 |                         |              |
| <b>Radiotherapy</b>    | No                     | 56    | 46       |         | 14          | 0.439/-     |                         |          |              | 13          | 0.444/-     |                         |              |
|                        | Conformal radiotherapy | 155   | 128      | 0.523   | 15          | 0.240/0.152 | 1.07 (0.94-1.22)        | 0.314    | 0.096        | 13          | 0.215/0.160 | 1.08 (0.95-1.24)        | 0.231        |
|                        | Gamma knife            | 364   | 340      |         | 13          | 0.332/0.060 |                         |          |              | 10          | 0.165/0.064 |                         |              |
| <b>Chemotherapy</b>    | No                     | 338   | 319      | <0.001  | 11          | 0.270/0.028 | <b>0.67 (0.56-0.81)</b> | <0.001   | <b>0.012</b> | 9           | 0.168/0.058 | <b>0.81 (0.68-0.97)</b> | <b>0.025</b> |
|                        | Yes                    | 237   | 195      |         | 16          | 0.387/0.152 |                         |          |              | 14          | 0.201/0.164 |                         |              |

OS: Overall survival; PFS: Progression free survival; MST, median survival time, SR: Survival rate; HR: Hazard ratio; 95% CI: 95% Confidence interval.

NTR+STR: near-total resection & sub-total resection; GTR: gross-total resection

Log-rank *p* values were calculated using the Chi-Square test.

*p* < 0.05 indicates statistical significance.
